# Supplementary material for: The interplay of SARS-CoV-2 evolution and constraints imposed by the structure and functionality of its proteins
Source: PubMed Central journal article supplement (PMC8291704; doi:10.1371/journal.pcbi.1009147), 2021-07-08

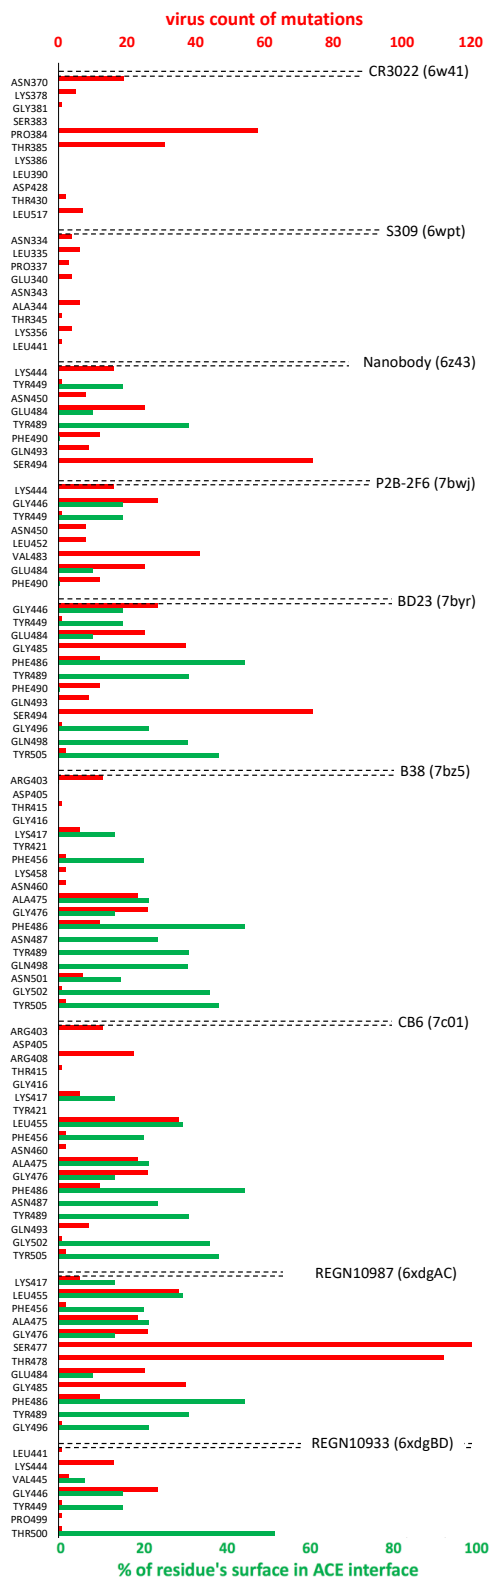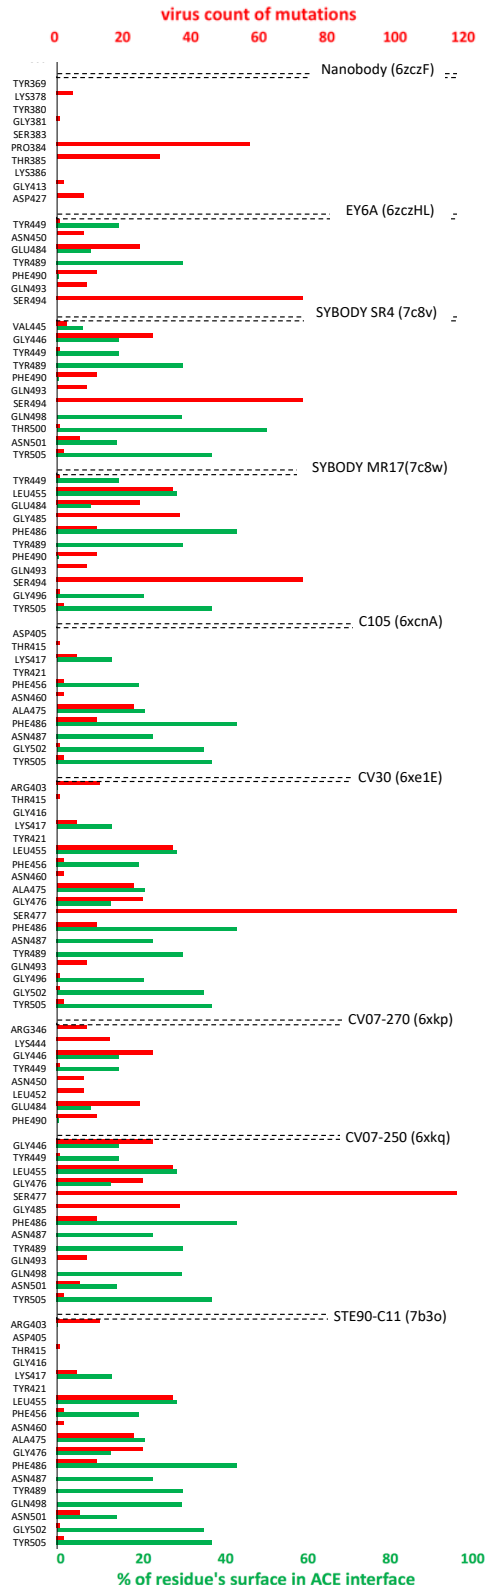

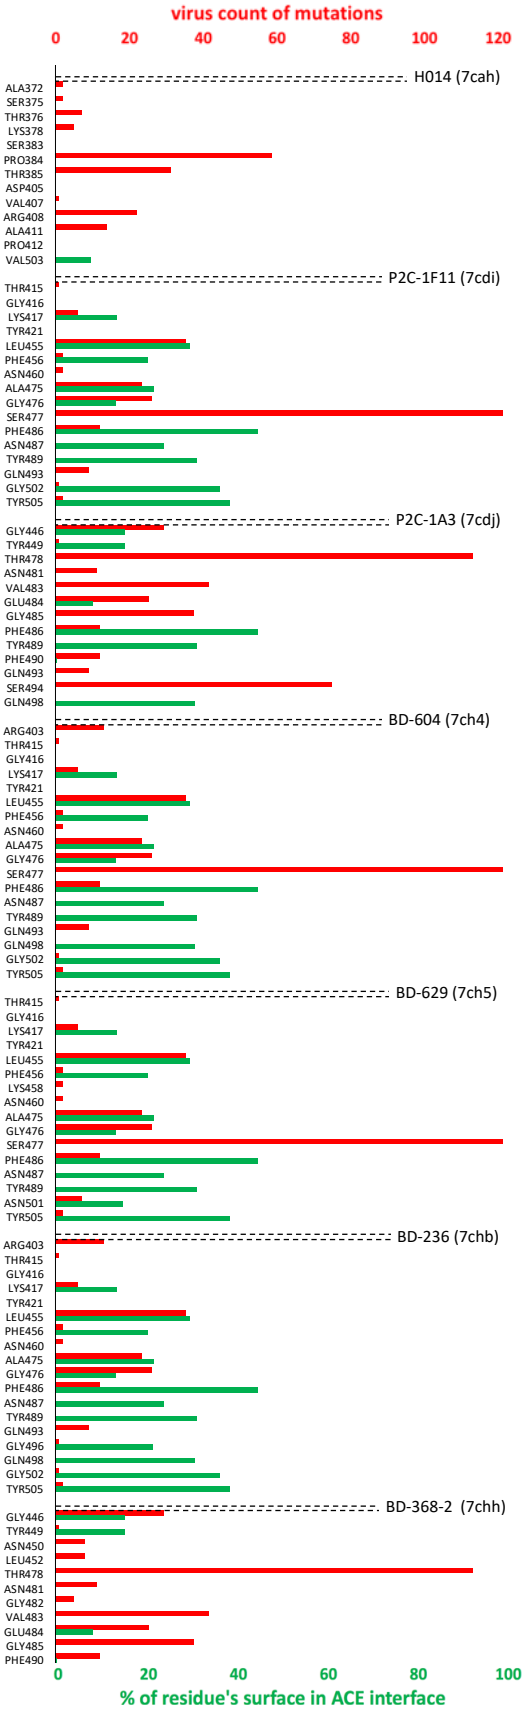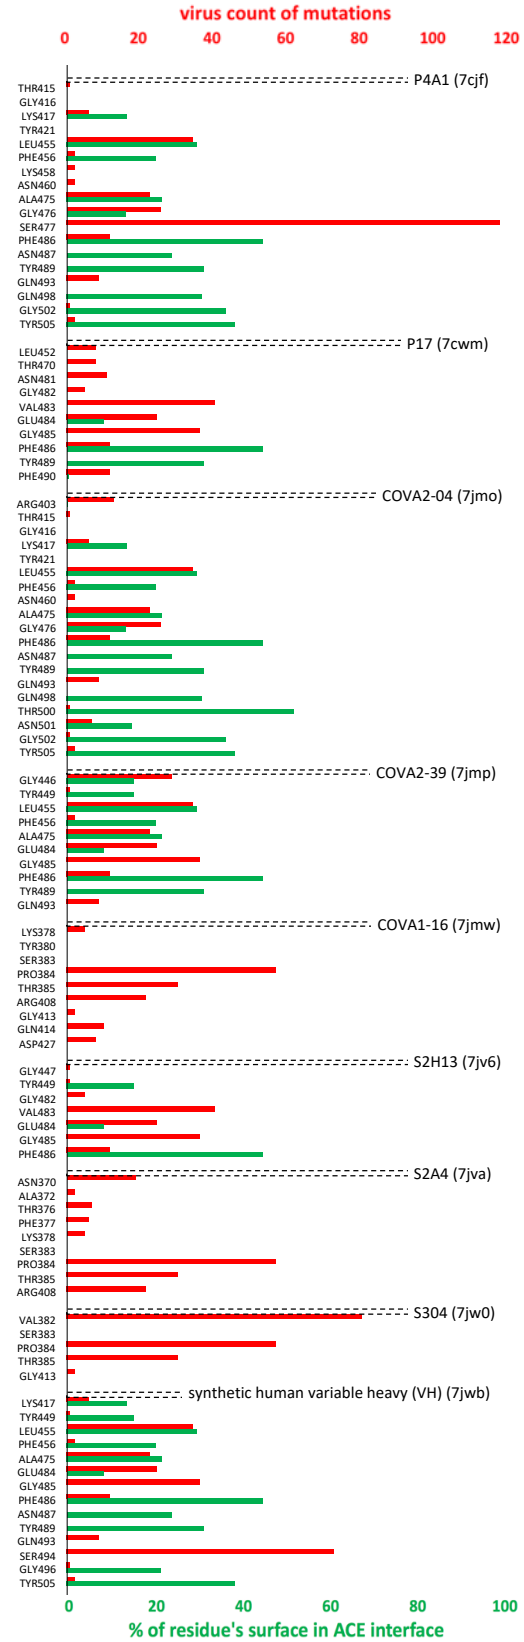

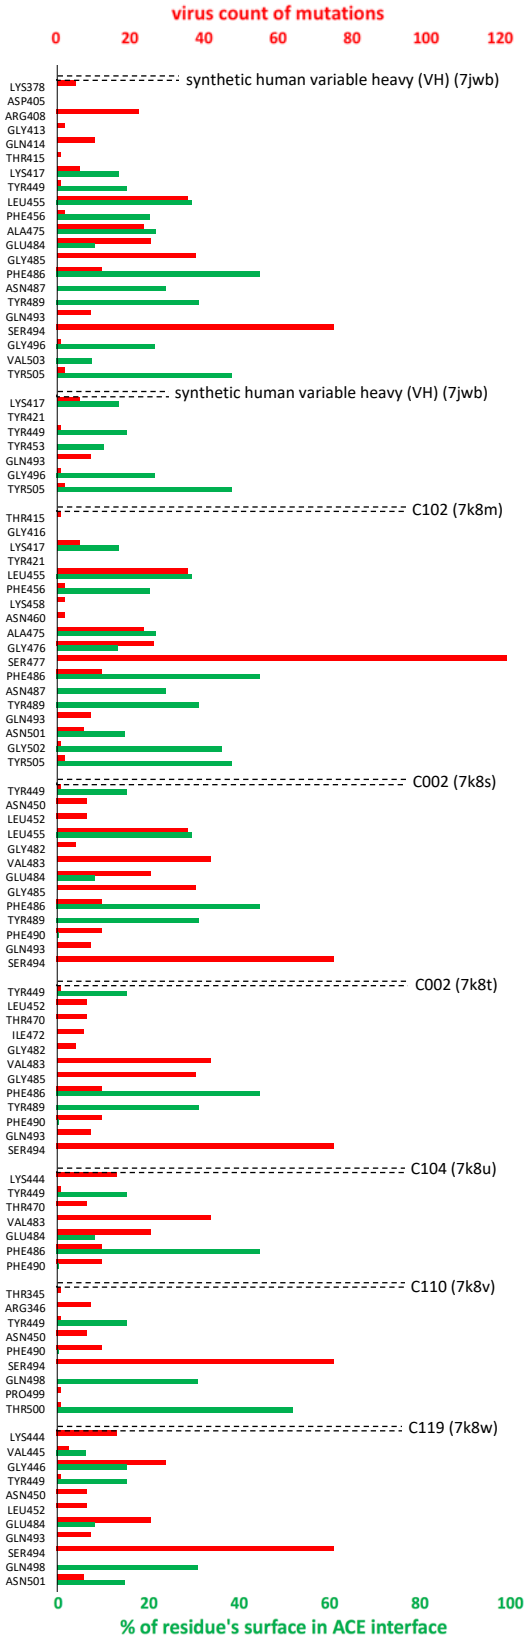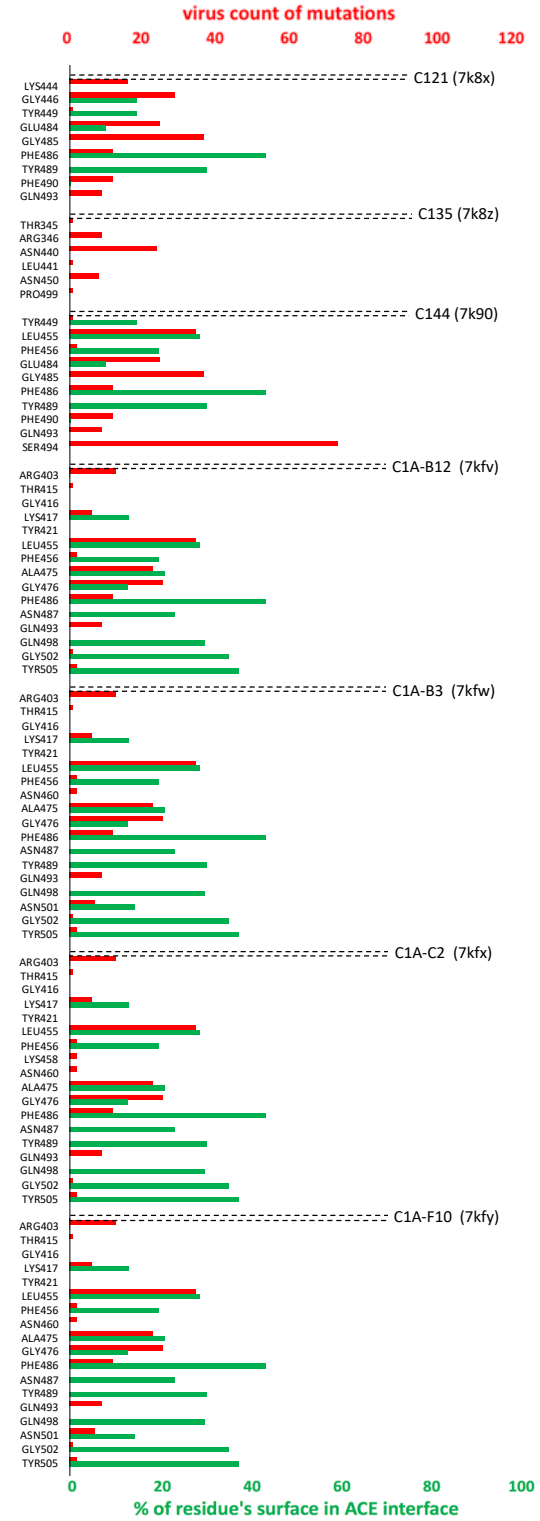

Supplement: pcbi.1009147.s002.pdf [file pcbi.1009147.s002.pdf]
